# Supplementary material
Source: PubMed Central journal article supplement (PMC4123649)
Supplement: supp_bgu100_revSuppl_info.pdf [file supp_bgu100_revSuppl_info.pdf]

| <b>Gene</b>        | <b>Forward Primer</b>           | <b>Reverse Primer</b>           | <b>Tm</b> |
|--------------------|---------------------------------|---------------------------------|-----------|
| <b>XNC10 (RT)</b>  | ggC AgT CAC ATT TTC CAA TAC AgC | CgA AAg ACg AAT gCg ATg g       | 59°C      |
| <b>XNC10 (qRT)</b> | CgC CAT CgC ATT CgT CTT TC      | TCT TCA ACA CCA gTC TTg TTC     |           |
| <b>XNC11 (RT)</b>  | CgA TgA CTT CTT CAC CgA CCC     | CCT TgC TCC ACT CTg gTA Tg      | 58°C      |
| <b>XNC11 (qRT)</b> | CgA TgA CTT CTT CAC CgA CCC     | gCg TTC CTg AgA AAC CTg CCA TC  |           |
| <b>CTX (RT)</b>    | gCA gCA gCg gTA ATC ggA g       | CTC AgC Atg gTC Atg gAA TTg     | 58°C      |
| <b>GAPDH (RT)</b>  | ACC CCT TCA TCg ACT Tgg AC      | ggA gCC AgA Cag TTT gTA gTg     | 55°C      |
| <b>GAPDH (qRT)</b> | GAC ATC AAG GCCGCC ATT AAG ACT  | AGA TGG AGG AGT GAG TGT CAC CAT |           |

**Supplementary Fig. S1**

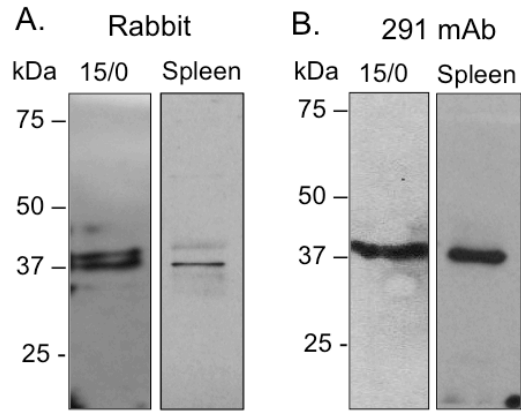

**Figure S1.** Western blot characterization of (A) the rabbit polyclonal and (B) 291 monoclonal anti-XNC10 antibodies on 15/0 and adult splenocytes cell lysates stained with HRP-goat anti-rabbit or anti-mouse conjugated secondary Ab, and ECL chemiluminescence.

Supplementary Fig. S2

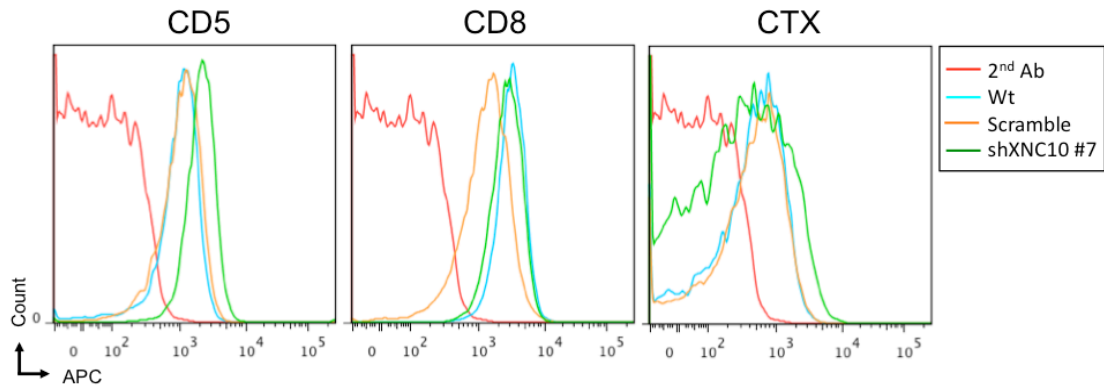

**Figure S2.** Transfected 15/0 tumor lines do not display altered CD5, CD8 or CTX surface expression. 15/0 WT, shScramble shXNC10 #4 or #7, cells were immune-stained for CTX-APC, CD5-PE or CD8-PE and analyzed by flow cytometry. Representative flow histograms of CD5 (left), CD8 (middle) and CTX (right) staining on tumor cells.

**Supplementary Fig. S3**

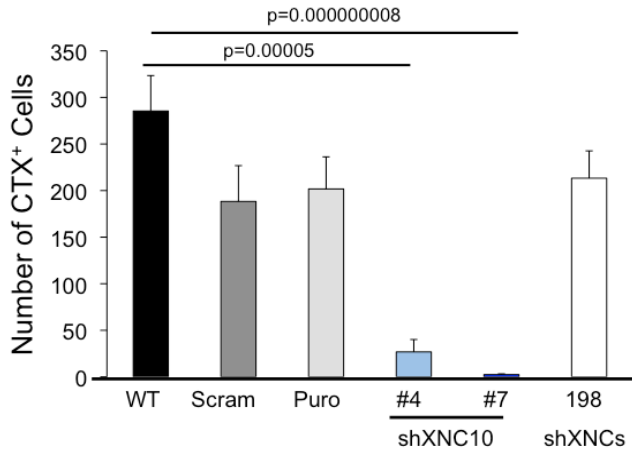

**Figure S3.** XNC10 silencing compromises *in vivo* tumor growth in the peritoneum of syngeneic tadpoles. LG15 tadpoles were intraperitoneally injected with  $1 \times 10^5$  15/0 WT, shScramble, Puromycin, shXNC10 clone #4 or #7 or shXNCs 198 tumor cells. At 7 days post-transplantation, peritoneal exudates were collected and total cells from individual animals were counted then combined into respective groups and stained with anti-CTX-APC. Quantification of total CTX+ tumor cells retrieved from 15/0 WT, shScramble, Puromycin, shXNC10 clone #4 or #7 or shXNCs 198 tumor transplanted animals. n=4 independent experiments, with 3-5 animals per experiment.

**Supplementary Fig. S4**

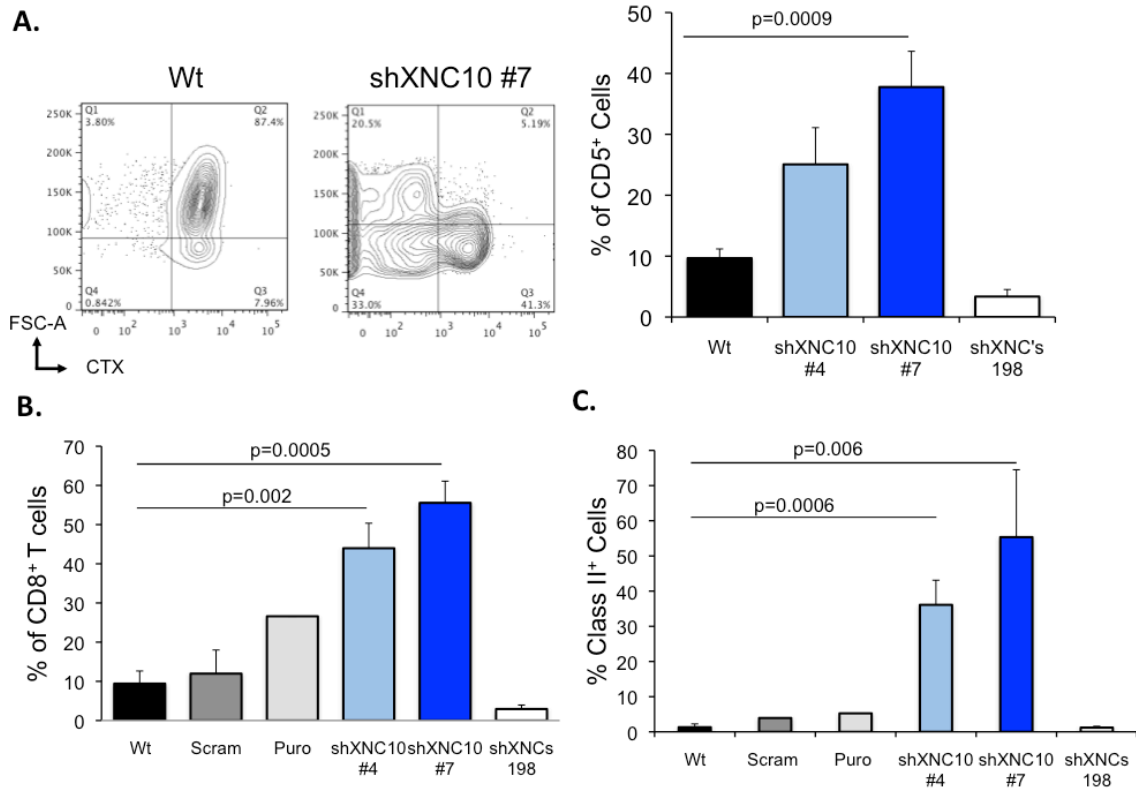

**Figure S4.** Transplantation of XNC10-deficient 15/0 tumors elicits cellular anti-tumor immune responses. Tadpoles were IP injected with  $1 \times 10^5$  cells of either 15/0 WT, shScramble, Puromycin, shXNC10 clone #4 or #7 or shXNCs 198 tumor cells. Cells were collected 7 days post transplantation and each group pooled, stained for CTX-APC and CD5-PE (Pan T-cell marker); CD8-PE; or Class II-PE and analyzed by flow cytometry. A, CD5+ B, CD8 C, Class II. Representative flow cytometry plots for CD5+ WT vs shXNC10 #7 are shown in the left panel of A. Three independent experiments were performed, with 5 animals per group. \* $p < 0.05$ ; \*\* $p < 0.05$ .

Supplementary Fig. 5

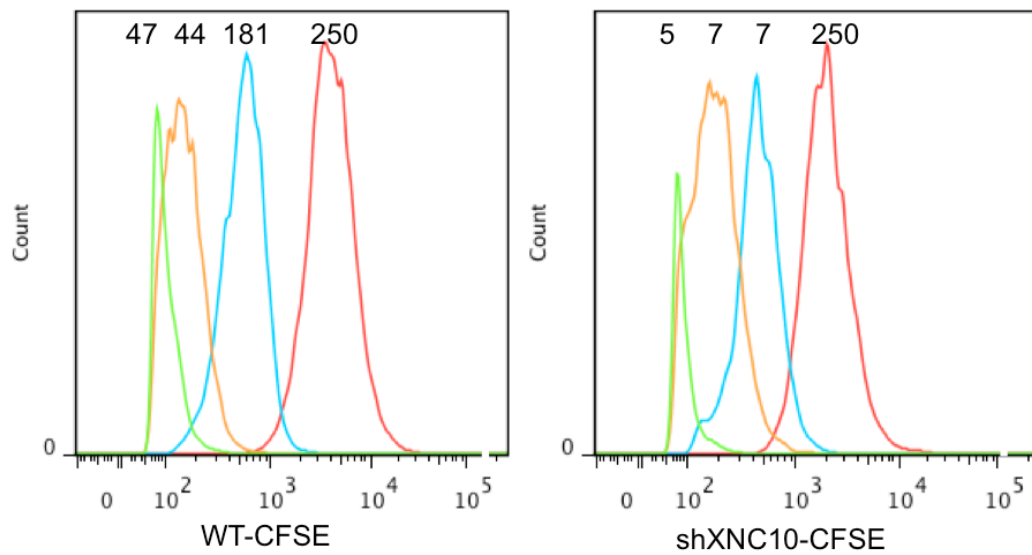

**Figure S5.** XNC10 deficiency does not inhibit the *in vivo* proliferative capability of 15/0 tumor cells.  $5 \times 10^5$  cells at a 1:1 ratio of WT-PKH/WT-CFSE or WT-PKH/shXNC10 #7-CFSE were injected into LG-15 tadpoles. CFSE dilution of WT-CFSE and shXNC10#7-CFSE was determined. Histograms of WT-CFSE (left) and shXNC10#7-CFSE (right) 15/0 tumor cells at day 0, 2, 4 and 7 post transplantation. The numbers of cells  $\times 10^6$  for each peak is indicated the top of each panel. One representative experiment shown where  $N=6-8$  animals.
